# Supplementary material for: A human vision inspired adaptive platform for one-on-multiple recognition
Source: Royal Society of Chemistry journal article supplement (doi:10.1039/c9cc00994a), 2019-01-01
Supplement: c9cc00994a1.pdf [file c9cc00994a1.pdf]

## SUPPLEMENTARY INFORMATION

# Human Vision Inspired Adaptive Platform for One-on-Multiple Recognition

Zhiyang Zhu, Jianbin Huang, Yun Yan\*

Beijing National Laboratory for Molecular Sciences (BNLMS), State Key Laboratory for Structural Chemistry of Unstable and Stable Species, College of Chemistry and Molecular Engineering, Peking University, Beijing, 100871 (China)

Email: [yunyan@pku.edu.cn](mailto:yunyan@pku.edu.cn)

This material includes:

1. Synthesis of DCM.....S-1
2. Optical property of DCM: Figures S1.....S-4
3. Binding ratio between DCM and metal ions: Figure S2.....S-5
4. IR spectrum of some DCM-Metal ions complex: Figure S3.....S-6
5. Selectivity of DCM-Zn in the detection of TETA: Figure S4-S5.....S-7
6. Selectivity of DCM-Ag in the detection of Cys: Figure S6.....S-8
7. Selectivity of DCM-Pb in the detection of H<sub>2</sub>S.....S-9
8. References S1,S2..... S-9

### 1. Synthesis of DCM

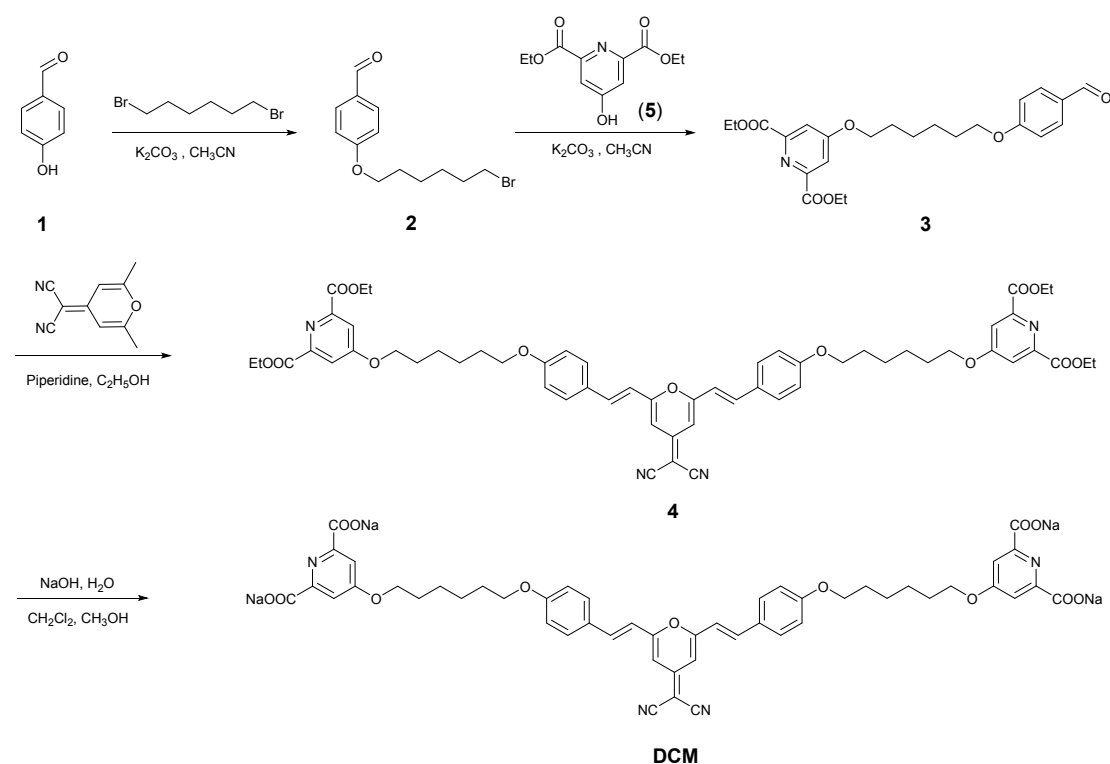

**Scheme S1.** Synthetic route for DCM.

**DCM** was prepared by condensation of aldehyde **3** and 4-dicyanomethylene-2,6-dimethyl-4*H*-pyran in the presence of piperidine, followed by a step of hydrolysis. According to the synthetic route depicted in Scheme S1, typical experimental procedures are given below.

Preparation of 4-((6-bromohexyl)oxy)benzaldehyde (**2**).

Synthesis of this compound followed the procedure reported in literature <sup>s1</sup>. Potassium carbonate (10.4 g), 1,6-dibromohexane (18.3 g), and 4-hydroxybenzaldehyde **1** (6.11 g) were mixed in dry CH<sub>3</sub>CN (250 mL) at room temperature. The mixture was then stirred and heated to reflux for 24 h under N<sub>2</sub> atmosphere. After filtration and solvent evaporation, the crude product was purified by silica gel chromatography using petroleum ether (PE)/ethyl acetate (EA) mixture (10:1 by volume) as eluent. After dried in vacuum, product **2** was obtained as a white solid (5.40 g, 38%). Melting point: 41 °C. Elemental analysis: Found: C, 54.8; H, 6.2. Calc. for C<sub>13</sub>H<sub>17</sub>BrO<sub>2</sub>: C, 54.75; H, 6.0%. FT-IR (anhydrous KBr, cm<sup>-1</sup>)  $\nu$ : 2950 (C-H), 1688 (CH=O). <sup>1</sup>H NMR (500 MHz, Chloroform-*d*)  $\delta$  (ppm): 9.88 (s, 1H), 7.85 – 7.80 (m, 2H), 7.01 – 6.97 (m, 2H), 4.05 (t, *J* = 6.4 Hz, 2H), 3.43 (t, *J* = 6.7 Hz, 2H), 1.90 (tt, *J* = 12.5, 6.2 Hz, 2H), 1.83 (dd, *J* = 13.6, 6.7 Hz, 2H), 1.59 – 1.50 (m, 4H). <sup>13</sup>C NMR (101 MHz, Chloroform-*d*)  $\delta$  (ppm): 190.81, 164.13, 132.01, 129.83, 114.73, 68.13, 33.75, 32.62, 28.90, 27.87, 25.24. ESI-MS *m/z*: [2+H]<sup>+</sup> Calcd for C<sub>13</sub>H<sub>18</sub>BrO<sub>2</sub>: 285.0482, found 285.0485.

Preparation of diethyl 4-((6-(4-formylphen-oxy)hexyl)oxy)pyridine-2,6-dicarboxylate (**3**).

Diethyl 4-hydroxypyridine-2,6-dicarboxylate (**5**) was synthesized according to the procedure previously reported by our group <sup>s2</sup>. Potassium carbonate (3.93 g), compound **2** (5.40 g) and compound **5** (4.53 g) were mixed in dry CH<sub>3</sub>CN (100 mL) at room temperature. The mixture was then stirred and heated to reflux for 24 h under N<sub>2</sub> atmosphere. After filtration and solvent evaporation, the crude product was purified by silica gel chromatography using PE/EA mixture (3:1-1:1 by volume) as eluent. Product **3** was obtained as a white solid (6.80 g, 81%). Melting point: 104 °C. Elemental analysis: Found: C, 65.1; H, 6.9; N, 3.1. Calc. for C<sub>24</sub>H<sub>29</sub>NO<sub>7</sub>: C, 65.0; H, 6.6; N, 3.2%. FT-IR (anhydrous KBr, cm<sup>-1</sup>)  $\nu$ : 2943 (=CH), 1733 (C=O), 1686 (CH=O), 1592 (C=N), 1250 (C-OEt). <sup>1</sup>H NMR (500 MHz, Chloroform-*d*)  $\delta$  (ppm): 9.88 (s, 1H), 7.83 – 7.81 (m, 2H), 7.77 (s, 2H), 7.00 – 6.97 (m, 2H), 4.46 (qd, *J* = 7.1, 3.9 Hz, 4H), 4.17 – 4.14 (m, 2H), 4.06 (dd, *J* = 10.5, 4.1 Hz, 2H), 1.93 – 1.79 (m, 4H), 1.63 – 1.53 (m, 4H), 1.45 (td, *J* = 7.1, 3.8 Hz, 6H). <sup>13</sup>C NMR (101 MHz, Chloroform-*d*)  $\delta$  (ppm): 190.77, 166.93, 164.79, 164.10, 150.15, 131.98, 129.82, 114.71, 114.29, 68.78, 68.11, 62.39, 28.96, 28.68, 25.72, 25.67, 14.20. ESI-MS *m/z*: [3+H]<sup>+</sup> Calcd for C<sub>24</sub>H<sub>30</sub>NO<sub>7</sub>: 444.2026, found 444.2017.

Preparation of ethyl ester of **DCM** (**4**).

A mixture of **3** (6.8 g), 4-dicyanomethylene-2,6-dimethyl-4*H*-pyran (1.29 g), piperidine (1.6 g), and absolute ethanol (75 mL) were refluxed under N<sub>2</sub> for 24 h. After filtration and solvent evaporation, the crude product was purified by silica gel chromatography using

PE/EA mixture (3:2-1:1 by volume) as eluent. Product **4** was obtained as a yellow solid (2.22 g, 29%). Melting point: 158 °C. Elemental analysis: Found: C, 67.9; H, 6.2; N, 5.4. Calc. for  $C_{58}H_{62}N_4O_{13}$ : C, 68.1; H, 6.1; N, 5.5%. FT-IR (anhydrous KBr,  $cm^{-1}$ )  $\nu$ : 2952 (=CH), 2210 ( $C\equiv N$ ), 1730 (C=O), 1647 (C=C), 1590 (C=N), 1246 (C-OEt).  $^1H$  NMR (500 MHz, DMSO- $d_6$ )  $\delta$  (ppm): 7.78 (s, 4H), 7.53 (d,  $J = 8.7$  Hz, 4H), 7.48 (d,  $J = 16.0$  Hz, 2H), 6.95 (d,  $J = 8.7$  Hz, 4H), 6.65 (s, 2H), 6.63 (d,  $J = 16.5$  Hz, 2H), 4.47 (q,  $J = 7.1$  Hz, 8H), 4.16 (t,  $J = 6.3$  Hz, 4H), 4.05 (t,  $J = 6.3$  Hz, 4H), 1.95 – 1.80 (m, 8H), 1.59 (s, 8H), 1.46 (t,  $J = 7.1$  Hz, 12H).  $^{13}C$  NMR (101 MHz, Chloroform- $d$ )  $\delta$  (ppm): 166.93 , 164.76 , 161.06 , 158.57 , 150.12 , 137.58 , 129.54 , 127.12 , 115.93 , 115.50 , 115.07 , 114.29 , 106.32 , 68.80 , 67.96 , 62.36 , 29.04 , 28.68 , 25.74 , 25.67 , 14.20 . ESI-MS  $m/z$ : [**4**+H] $^+$  Calcd for  $C_{58}H_{63}N_4O_{13}$ : 1023.4365, found 1023.4386.

#### Preparation of **DCM**.

To the solution of compound **4** (0.80 g) in 1-1 dichloromethane-methanol mixture (20 mL), sodium hydroxide (0.19 g) and water (1.5 mL) was added. The mixture was then stirred and heated to reflux for 2 h under  $N_2$  atmosphere. After filtration, the crude product was first acidified in water and filtered, then converted to sodium salts in ethanol using sodium hydroxide. The precipitates were collected and dried in vacuum. Such process was repeated for 3 times. The final product **DCM** was obtained as a yellow powder (0.35 g, 45%). Elemental analysis: Found: C, 55.9; H, 4.8; N, 5.1. Calc. for  $C_{50}H_{42}N_4Na_4O_{13}\cdot 4H_2O$ : C, 56.1; H, 4.7; N, 5.2%. FT-IR (anhydrous KBr,  $cm^{-1}$ )  $\nu$ : 2939 (=CH), 2207 ( $C\equiv N$ ), 1634 (C=O), 1423 (C-O).  $^1H$  NMR (500 MHz, DMSO- $d_6$ )  $\delta$  (ppm): 7.76 (d,  $J = 8.6$  Hz, 4H), 7.74 (d,  $J = 16.1$  Hz, 2H), 7.67 (s, 4H), 7.24 (d,  $J = 16.1$ , 2H), 7.03 (d,  $J = 8.6$  Hz, 4H), 6.82 (s, 2H), 4.27 (t,  $J = 6.5$  Hz, 4H), 4.10 – 4.03 (m, 4H), 1.78 (m, 4H), 1.51 (m, 4H).  $^{13}C$  NMR (125 MHz, DMSO- $d_6$ )  $\delta$  (ppm): 160.94 , 150.16 , 130.44 , 128.08 , 117.11 , 115.41 , 113.16 , 106.76 , 69.49 , 68.12 , 61.11 , 28.98 , 28.56 , 25.75 , 25.60 , 25.47. ESI-MS  $m/z$ : [**DCM**-H] $^-$  Calcd for  $C_{50}H_{46}N_4O_{13}$ : 909.2989, found. 909.2938.

## 2. Optical behaviors of DCM

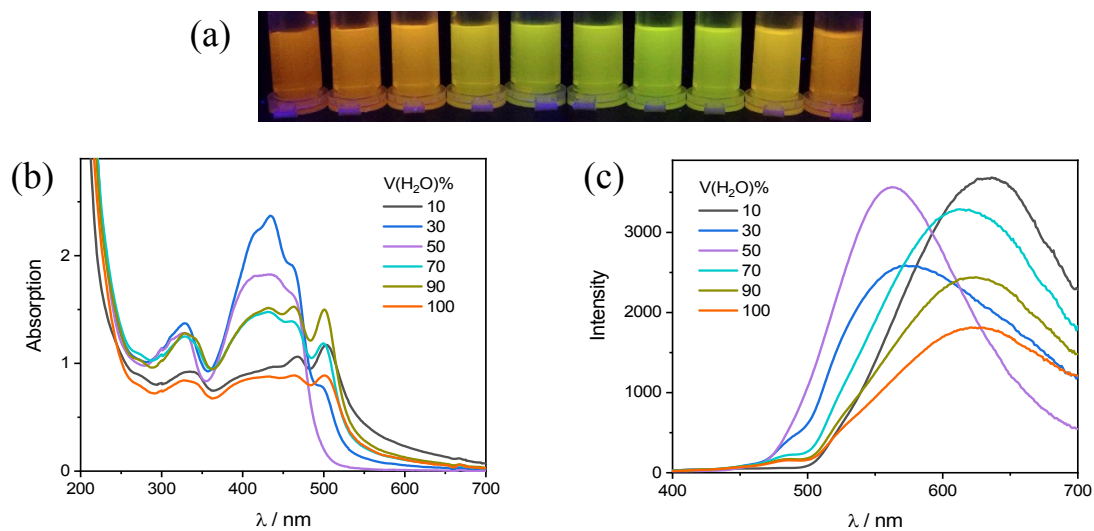

**Figure S1.** (a) Fluorescent pictures of DCM solutions in mixed H<sub>2</sub>O-EtOH solvent under 365nm UV lamp, water volume fraction (%) are 100, 90, 80, 70, 60, 50, 40, 30, 20, 10 from left to right, [DCM] = 50 μM. (b) Absorption spectrum of DCM solutions in mixed H<sub>2</sub>O-EtOH solvent. (c) Emission spectrum of DCM solutions in mixed H<sub>2</sub>O-EtOH solvent, the excitation wavelength is 365 nm. [DCM] = 50 μM.

The fluorescence of **DCM** can be regulated by changing solvent polarity. The absorption and emission maximums are both greatly red-shifted when it is dispersed in water or ethanol rich solvents, which indicate the formation of ICT complexes.

### 3. Binding ratio between DCM and metal ions

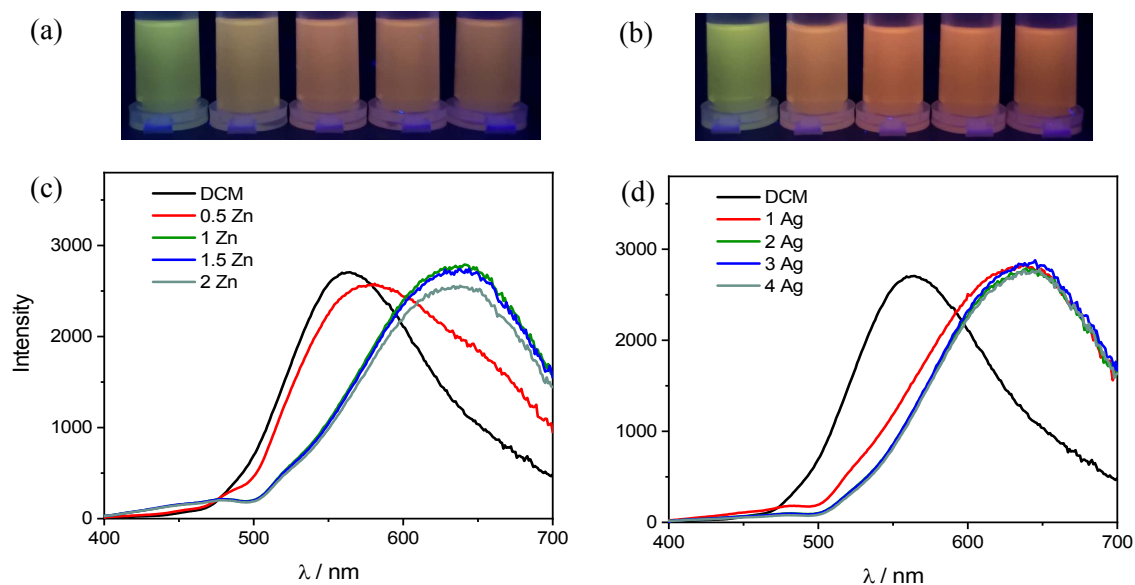

**Figure S2.** Fluorescent pictures of 50 μM DCM with (a) 0, 25, 50, 75, 100 μM Zn<sup>2+</sup> and (b) 0, 50, 100, 150, 200 μM Ag<sup>+</sup> in 1-1 water-ethanol mixed solvents under 365nm UV lamp. (c) and (d) are corresponding fluorescent spectrums.

The determination of molar ratios between **DCM** and metal ions was simply based on fluorescent results. Generally, divalent metal ions, represented by Zn<sup>2+</sup>, can afford stable fluorescent regulation with the addition of equivalent amount. Ag<sup>+</sup> need two equivalent to achieve similar results. Therefore, such molar ratios were selected for the following experiments.

#### 4. IR spectrum of some DCM-Metal ions complex

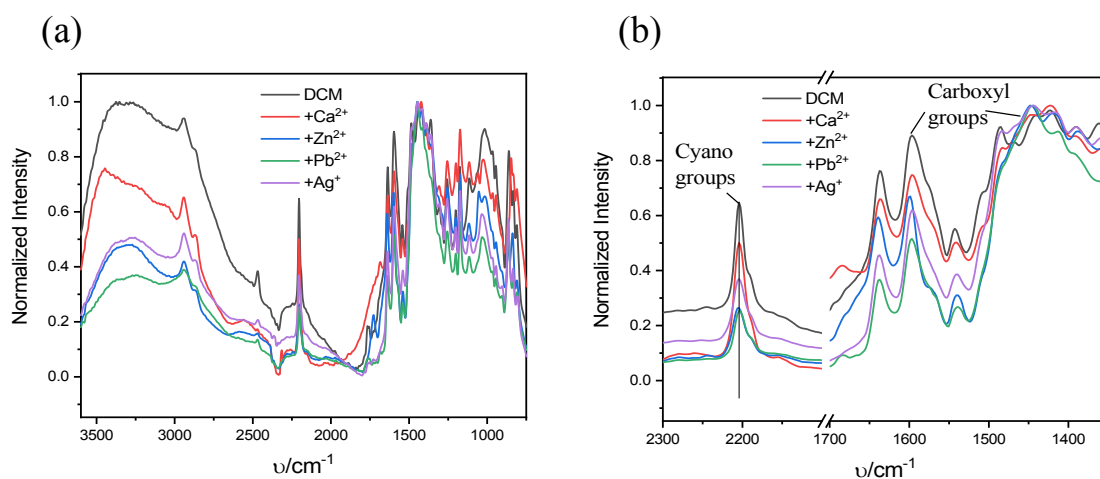

**Figure S3.** (a) IR spectra of DCM+M<sup>n+</sup> systems that exhibit ICT emission. (b) Detailed spectrums about cyano groups in the fluorophore and carboxyls groups in the head groups.

The cyano groups are possible coordinative sites with metal ions, but their vibrational peaks at around 2200  $\text{cm}^{-1}$  remain unaffected in different systems. In contrast, the C-O vibration peaks of carboxyls groups are changed, indicating a binding of metal ions.

## 5. Selectivity in the detection of TETA

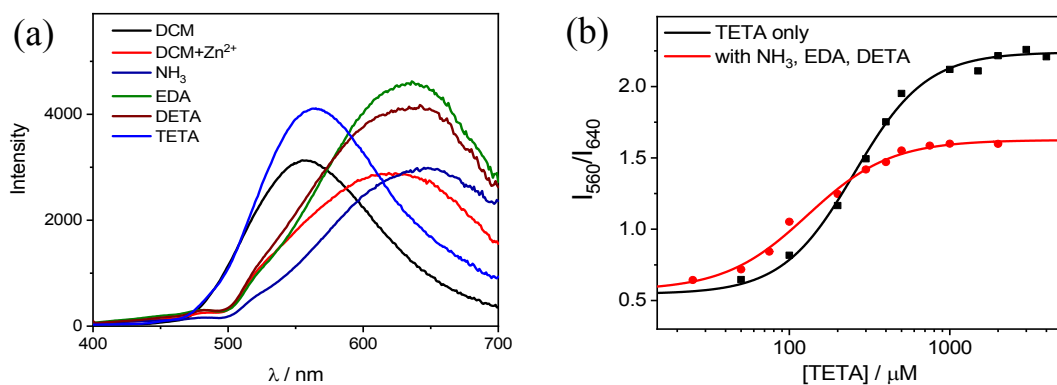

**Figure S4.** (a) Emission spectrums of DCM-Zn<sup>2+</sup> in the presence of various amines. (b) Detection of TETA with co-existence of NH<sub>3</sub>, EDA and DETA. [DCM] = [Zn<sup>2+</sup>] = 50 μM, [NH<sub>3</sub>] = [EDA] = [DETA] = [TETA] = 1 mM if not mentioned.

Under equivalent concentration, the detection of TETA was barely affected by other amine species or common Zn<sup>2+</sup>-binding species.

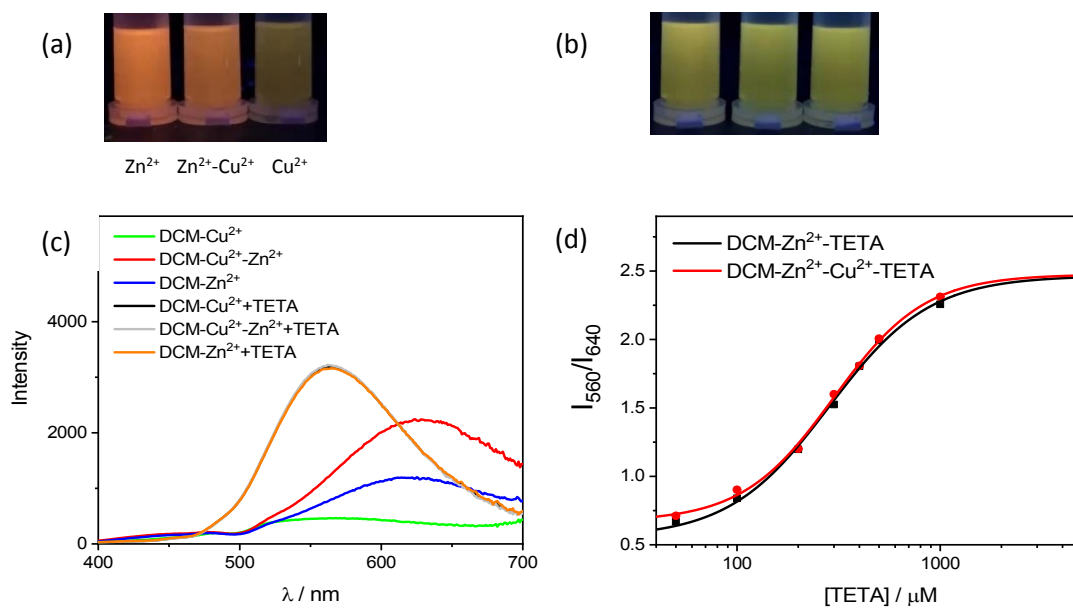

**Figure S5:** Fluorescent pictures of DCM-Zn<sup>2+</sup>, DCM-Zn<sup>2+</sup>-Cu<sup>2+</sup>, DCM-Cu<sup>2+</sup> (a) without TETA, (b) with TETA, and (c) corresponding emission spectrum. (d) Ratiometric response of DCM-Zn<sup>2+</sup> and DCM-Zn<sup>2+</sup>-Cu<sup>2+</sup> towards TETA.

## 6. Selectivity in the detection of Cys

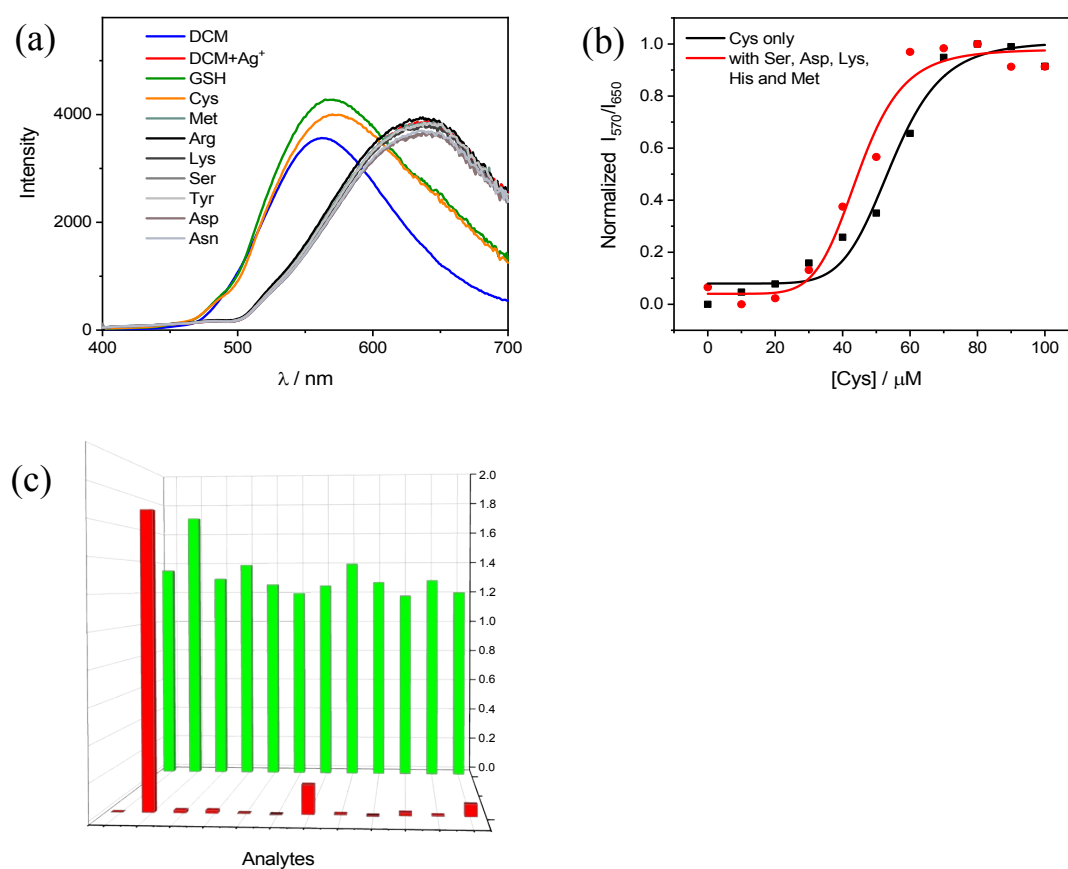

**Figure S6.** (a) Emission spectrums of **DCM-Ag<sup>+</sup>** in the presence of polar amino acids. (b) Detection of Cys with co-existence of Ser, Asp, Lys, His and Met. (c) Ratiometric response of **DCM-Ag<sup>+</sup>** towards various competing species without (Red bar) or with (Green bar) additional GSH. From left to right: None, GSH, Cys-Cys, Met, Lys, Arg, His, Asp, Asn, Glu, Tyr, BSA (Bovine serum albumin). [DCM] = [Ag<sup>+</sup>]/2 = 50 μM, [Amino acids] = 100 μM if not mentioned.

Under equivalent concentration, the detection of Cys was barely affected by other amino acids. Similar results can be obtained if Cys was replaced with GSH (Figure S5c).



## 7. Selectivity in the detection of H<sub>2</sub>S

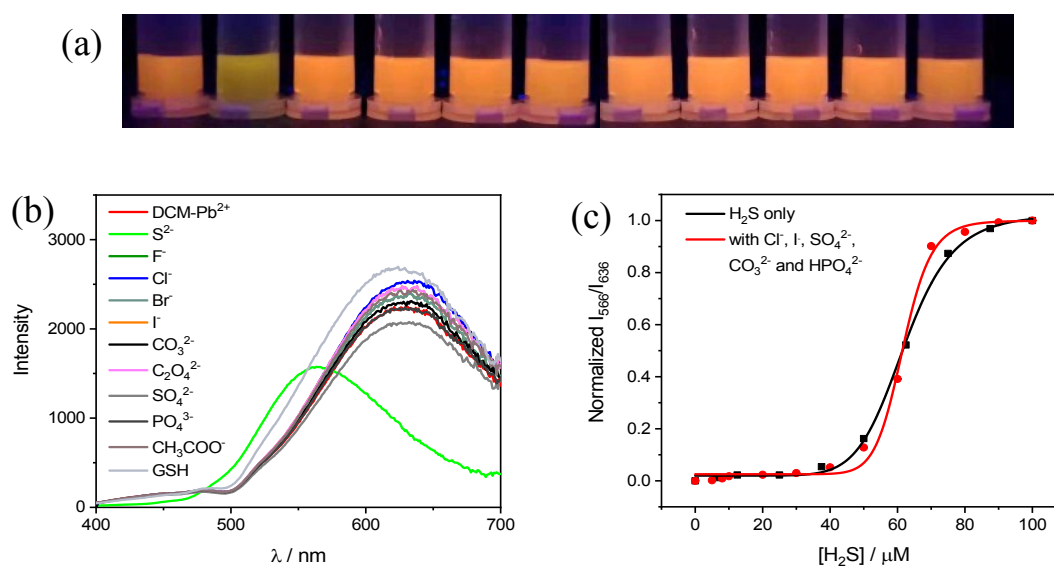

**Figure S7.** (a) Fluorescent pictures of DCM-Pb<sup>2+</sup> system in the existence of various anions under 365nm UV lamp. From left to right, anions are OH<sup>-</sup>, S<sup>2-</sup>, F<sup>-</sup>, Cl<sup>-</sup>, Br<sup>-</sup>, I<sup>-</sup>, CO<sub>3</sub><sup>2-</sup>, C<sub>2</sub>O<sub>4</sub><sup>2-</sup>, SO<sub>4</sub><sup>2-</sup>, PO<sub>4</sub><sup>3-</sup>, CH<sub>3</sub>COO<sup>-</sup>. (b) Emission spectrum of DCM-Pb<sup>2+</sup> system in the existence of various competitors. (c) Detection of H<sub>2</sub>S with the co-existence of Cl<sup>-</sup>, I<sup>-</sup>, SO<sub>4</sub><sup>2-</sup>, CO<sub>3</sub><sup>2-</sup> and HPO<sub>4</sub><sup>2-</sup>. [DCM] = [Pb<sup>2+</sup>] = 50 μM, [Analytes] = 150 μM if not mentioned.

Under same concentration, the detection of H<sub>2</sub>S was barely affected by common anions and thiols, indicating the good selectivity of DCM-Pb<sup>2+</sup> towards H<sub>2</sub>S.

### References:

- S1. H. Zhang, Y. Qu, Y. Gao, J. Hua, J. Li and B. Li, *Tetrahedron Lett.*, 2013, **54**, 909-912.
- S2. L. Zhao, X. Cheng, Y. Ding, Y. Yan and J. B. Huang, *Soft Matter*, 2012, **8**, 10472-10478.
